# Supplementary material
Source: publisher site journal article supplement (https://www.dovepress.com/article/361636)
Supplement: Supplementary file 1 [file get_supplementary_file.php]

**Supplementary material**

[Supplementary video S1](http://youtu.be/w7iop46HRVo): A video illustrating the surgical technique of suprachoroidal injection, 24 gauge intravenous branula and 30 gauge 1cc insulin syringe (SUNGSHIM MEDICAL CO., LTD, Korea) were used. Needle was removed from branula and the branula was cut in a way that allows only 1000um of insulin syringe to protrude from the branula edge. Suprachoroidal injection of 0.1 ml (4mg) of Triamcinolone Acetonide (Kenakort A by GlaxoSmithKline Brentford, Middlesex, TW8 9GS, United Kingdom) was performed in the superotemporal quadrant 3.5mm from the limbus with bevel pointing backwards. Slight pressure was done after entry to produce slight scleral dimple, if there was no resistance, the plunger was pushed and injection was done followed by use of cotton tipped applicator to minimize drug reflux.
